# Supplementary material for: Built-in electric field in the Mn/C60 heterojunction promotes electrocatalytic nitrogen reduction to ammonia
Source: Royal Society of Chemistry journal article supplement (doi:10.1039/d4nr04496g), 2025-01-01
Supplement: d4nr04496g1.pdf [file d4nr04496g1.pdf]

## **Elaborated Built-In Electric Field in Mn/C<sub>60</sub> heterojunction Promotes Electrocatalytic Nitrogen Reduction to Ammonia**

Hao Xue<sup>ab</sup>, Kaiheng Zhao<sup>c</sup>, Denglei Gao<sup>d</sup>, Fangying Duan<sup>e</sup>, Zijian Gao<sup>f</sup>, Wenjia Yu<sup>g</sup>,

Sha Li<sup>\*h</sup>, Menglei Yuan<sup>\*be</sup>, and Zongjing Lu<sup>\*a</sup>

<sup>a</sup>Institute of Photochemistry and Photofunctional Materials, University of Shanghai for Science and Technology, Shanghai 200093, China. E-mail: zongjinglu@usst.edu.cn

<sup>b</sup>Queen Mary University of London Engineering School, Northwestern Polytechnical University, Xi'an 710129, China.

<sup>c</sup>Key Laboratory of Photochemistry, Institute of Chemistry, Chinese Academy of Sciences, University of Chinese Academy of Sciences, Beijing 100190, China.

<sup>d</sup>School of Chemical Engineering, Shandong Institute of Petroleum and Chemical Technology, Dongying, Shandong 257061, China.

<sup>e</sup>State Key Laboratory of Solidification Processing and School of Materials Science and Engineering, Northwestern Polytechnical University, Xi'an 710072, China. E-mail: mlyuan@nwpu.edu.cn

<sup>f</sup>CAS Key Laboratory of Green Process Engineering, Institute of Process Engineering, Chinese Academy of Sciences, Beijing 100190, China.

<sup>g</sup>Yantai Research Institute of Harbin Engineering University, Yantai, 264006, China.

<sup>h</sup>Chemistry and Chemical Engineering Guangdong Laboratory, Shantou 515021, China.  
E-mail: lisha@ccelab.com.cn

\*Corresponding Author(s)

## **SI. Experimental section**

### **1. Materials**

Buckminsterfullerene [ $C_{60}$ , 99.9%], manganese carbonyl [ $Mn_2(CO)_{10}$ , 98%], di-sodium hydrogen phosphate dihydrate [ $Na_2HPO_4 \cdot 2H_2O$ , 99%], acetone [ $CH_3COCH_3$ , 99.9%], salicylic acid [ $C_7H_6O_3$ ,  $\geq 99.0\%$ ], sodium citrate [ $C_6H_5Na_3O_7$ , 98%], sodium hypochlorite (NaClO), sodium nitroferricyanide dihydrate [ $C_5FeN_6Na_2O \cdot 2H_2O$ , 99.0%], sodium hydroxide [NaOH, 98-100.5%], ammonium chloride [ $NH_4Cl$ , 99.5%] and Nafion membrane 211 were purchased from Sigma-Aldrich Chemical Reagent Co., Ltd. Ethanol (99.5%) were purchased from Beijing Chemical Crop. The water was purified by a Millipore system. All these reagents were used without any further purification.

### **2. Preparation of Mn/ $C_{60}$**

$Mn_2(CO)_{10}$  (20 mg) and  $C_{60}$  (80 mg) were put into the agate mortar and ground for 30 minutes, followed by heating to 300 °C at a heating rate of 5 °C min<sup>-1</sup> under argon atmosphere. After annealing at 300 °C for 1 h, the Mn/ $C_{60}$  sample was obtained through natural cooling to room temperature.

### **3. Preparation of Mn**

Mn NPs were synthesized to demonstrate the critical role of  $C_{60}$  in the electrocatalytic process.  $Mn_2(CO)_{10}$  (40 mg) was mingled evenly and put into porcelain boat for heating treatment. Subsequently, after the same annealing and post-treatment process as in the synthesis of Mn/ $C_{60}$ , the metal Mn nanoparticles were successfully synthesized.

### **4. Preparation of $C_{60}$**

The synthetic procedures for C<sub>60</sub> is similar to those for Mn, C<sub>60</sub> (40 mg) was mingled evenly and put into porcelain boat for heating treatment. Subsequently, proceeding the same annealing and post-treatment process as in the synthesis of Mn/C<sub>60</sub>.

## **5. Characterization**

X-ray diffraction (XRD, X'PERT PRO MPD diffractometer, Cu K $\alpha$  radiation,  $\lambda=0.15418$  nm, scanned range of 2-90°) was used to identify the crystal structure of all prepared catalysts. Scanning electron microscopy (SEM, JSM-7800F Prime) and transmission electron microscopy (TEM, JEM-2100F) were utilized to investigate the morphology of all samples. X-ray photoelectron spectroscopy (XPS) data were collected by using Krato, AXIS-HS monochromatized Al K $\alpha$  cathode source of 75-150 W under ultrahigh vacuum. Moreover, the UV-visible adsorption spectra were recorded on a spectrophotometer (UV-2550). <sup>1</sup>H NMR spectra were collected on a superconducting-magnet NMR spectrometer (Bruker AVANCE III HD 700 MHz). Besides, dimethyl sulphoxide was utilized as an internal standard to calibrate the chemical shifts in the spectra.

## **6. Electrochemical measurements**

In order to eliminate any ammonia and other contaminants, all components of the electrochemical cell were firstly soaked in 0.05 M H<sub>2</sub>SO<sub>4</sub> solution for 24 h and then washed copiously with fresh ultrapure water before NRR tests. Besides, all labware (needles, vials, pipet tips, containers, etc.) utilized in this work were also treated by 0.1 M H<sub>2</sub>SO<sub>4</sub> solution and water. All electrochemical characterizations were performed using a CHI 660E workstation coupled with a three-electrode system in a single-

chamber electrolytic cell. Carbon cloth utilized in this work was purchased from CeTech (W1S1009 type) and treated with the mixture of  $\text{H}_2\text{SO}_4\text{:H}_2\text{O}_2$  (1:3 vol.) for 12 h to remove surface impurities. To avoid excessive oxidation by oxygen and contamination with ambient ammonia or other nitrogen-containing species in air, electrodes were used either immediately after preparation or kept in vacuum before being used in electrochemical experiments. The prepared catalyst loaded on a piece of pretreated carbon cloth ( $1 \times 1 \text{ cm}^2$ ) was used as the working electrode, a graphite rod and Ag/AgCl (saturated KCl electrolyte) were employed as counter electrode and reference electrode, respectively. Potential without iR-compensated were converted to RHE scale via the following equation:  $E \text{ (vs. RHE)} = E \text{ (vs. Ag/AgCl)} + 0.7736$ . The catalyst ink for working electrode was prepared by dispersing 2 mg of catalyst in a mixed solution of 15  $\mu\text{L}$  Nafion (0.5 wt%), 250  $\mu\text{L}$  acetone and 235  $\mu\text{L}$  water followed by sonication for 30 minutes. Mass loading of  $0.3 \text{ mg cm}^{-2}$  was used for electrochemical study. All experiments were carried out at room temperature ( $25^\circ\text{C}$ ). To remove the impurities in the inlet gas, such as  $\text{NH}_3$  and  $\text{NO}_x$ , the prepurification of high-purity  $\text{N}_2$  (purity 99.999%) and Ar (purity 99.99%) by passing through a saturator filled with 0.05 M NaOH and a saturator filled with 0.05 M  $\text{H}_2\text{SO}_4$  solution to remove any possible contaminants. Before carrying out all the electrochemical characterizations, the 0.08 M  $\text{Na}_2\text{HPO}_4$  electrolyte solution was purged with  $\text{N}_2$  for 30 minutes. Cyclic voltammetry (CV) test was carried out on at a scan rate of  $50 \text{ mV s}^{-1}$  ranging from -1.2264-0.7736 V (vs. RHE). Linear sweep voltammetry (LSV) was also conducted at a scan rate of  $10 \text{ mV s}^{-1}$ . Chronoamperometric test were then conducted at different potentials and pure

N<sub>2</sub> was continuously fed into the cathodic cell during the experiments.

## 7. Calculation of Faradaic efficiency (FE) and NH<sub>3</sub> formation rate

The FE for NRR was defined as the amount of electric charge used for producing NH<sub>3</sub> divided the total charge passed through the electrodes during the electrolysis. Assuming three electrons were needed to produce one NH<sub>3</sub> molecule, the FE was calculated according to the following equation:

$$FE = 3 \times 0.318 \times F \times C_{\text{NH}_4\text{Cl}} \times V / (17 \times Q)$$

The rate of formation of NH<sub>3</sub> was calculated using the following equation:

$$\text{NH}_3 \text{ yield rate} = 0.318 \times C_{\text{NH}_4\text{Cl}} \times V / (m_{\text{cat}} \times t)$$

Where F is Faraday constant (96485 C mol<sup>-1</sup>), C<sub>NH<sub>4</sub>Cl</sub> is the measured mass concentration of NH<sub>4</sub>Cl; V is the volume of the cathodic reaction electrolyte; Q is the quantity of applied charge/electricity; t is the time for which the potential was applied; m<sub>cat</sub> is the mass of catalyst loaded at the carbon cloth.

## 8. DFT calculations

The first-principles spin-polarized calculations were carried out using the Vienna Ab initio Simulation Package (VASP).<sup>1, 2</sup> The exchange-correlation energy was modeled with the Perdew-Burke-Ernzerhof (PBE) functional within the generalized gradient approximation (GGA).<sup>3, 4</sup> The interactions between ions and electrons were accurately described using the projector augmented wave (PAW) method.<sup>5</sup> A plane-wave basis set with a cutoff energy of 500 eV was employed throughout the calculations. Convergence criteria for energy and force were set to 10<sup>-5</sup> eV and 0.01 eV/Å, respectively. For structural relaxation, the Brillouin zone was sampled using a 3 × 3 × 1 grid based on the Monkhorst-Pack scheme. Long-range van der Waals (vdW) interactions were accounted for with Grimme's DFT-D3 dispersion correction method. A vacuum slab of over 15 Å was applied along the z-direction. The change in free

energy ( $\Delta G$ ) for each hydrogenation step was computed using the computational hydrogen electrode (CHE) model,<sup>7</sup> where  $\Delta G$  for each surface was defined by the equation:  $\Delta G = \Delta E + \Delta E_{\text{ZPE}} - T\Delta S + \Delta G_{\text{U}} + \Delta G_{\text{pH}}$ . Here,  $\Delta E$  was derived from DFT calculations,  $\Delta E_{\text{ZPE}}$  represents the zero-point energy (ZPE) corrections, and  $\Delta S$  accounts for entropy corrections. The temperature ( $T$ ) was set to 298.15 K, and the pressure was set to 0.1 MPa.  $\Delta G_{\text{U}}$  represents the contribution of the applied potential, with  $U$  being the applied electrode potential.  $\Delta G_{\text{pH}}$  is the free energy correction for the  $\text{H}^+$  concentration, defined as  $\Delta G_{\text{pH}} = k_{\text{B}}T \times \ln 10 \times \text{pH}$ , where  $k_{\text{B}}$  is the Boltzmann constant and the pH value is zero. The limiting potential ( $U_{\text{L}}$ ) for the overall elementary step was calculated by determining the potential-determining step (PDS), which exhibits the most positive Gibbs free energy change ( $\Delta G_{\text{max}}$ ), using the formula:  $U_{\text{L}} = -\Delta G_{\text{max}}/e$ .

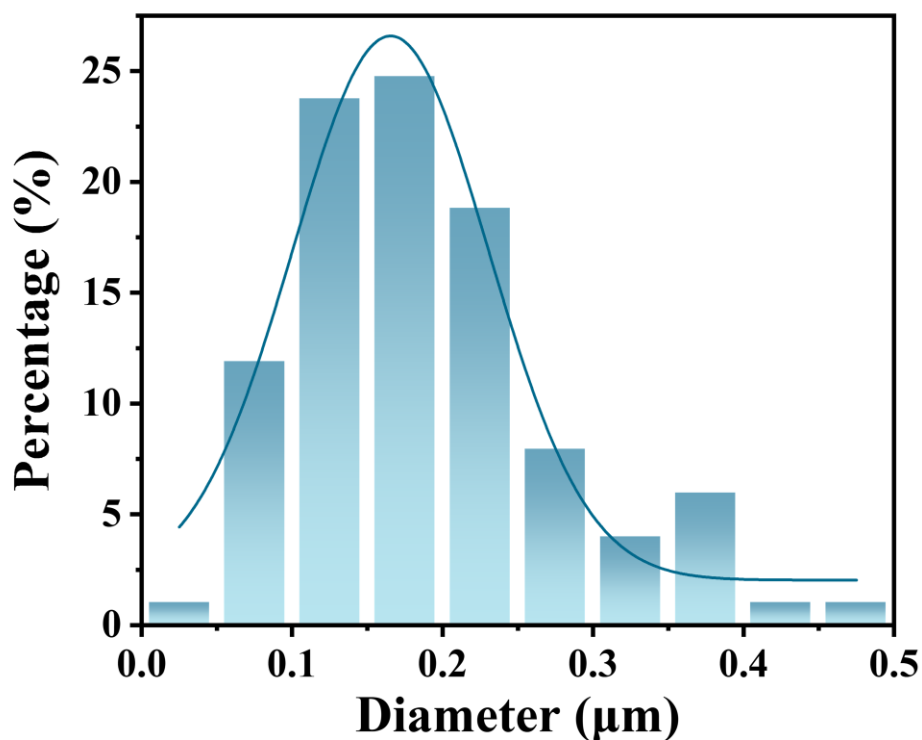

**Figure S1.** Average size distribution measured in SEM for 101 particles utilizing *Nano Measurer 1.2* software.

**Table S1.** Work function of Mn (101), C<sub>60</sub> and C<sub>60</sub>/Mn (101).

| Slab                     | Work function (eV) |
|--------------------------|--------------------|
| C <sub>60</sub>          | 5.52               |
| Mn(101)                  | 3.75               |
| C <sub>60</sub> /Mn(101) | 3.23               |

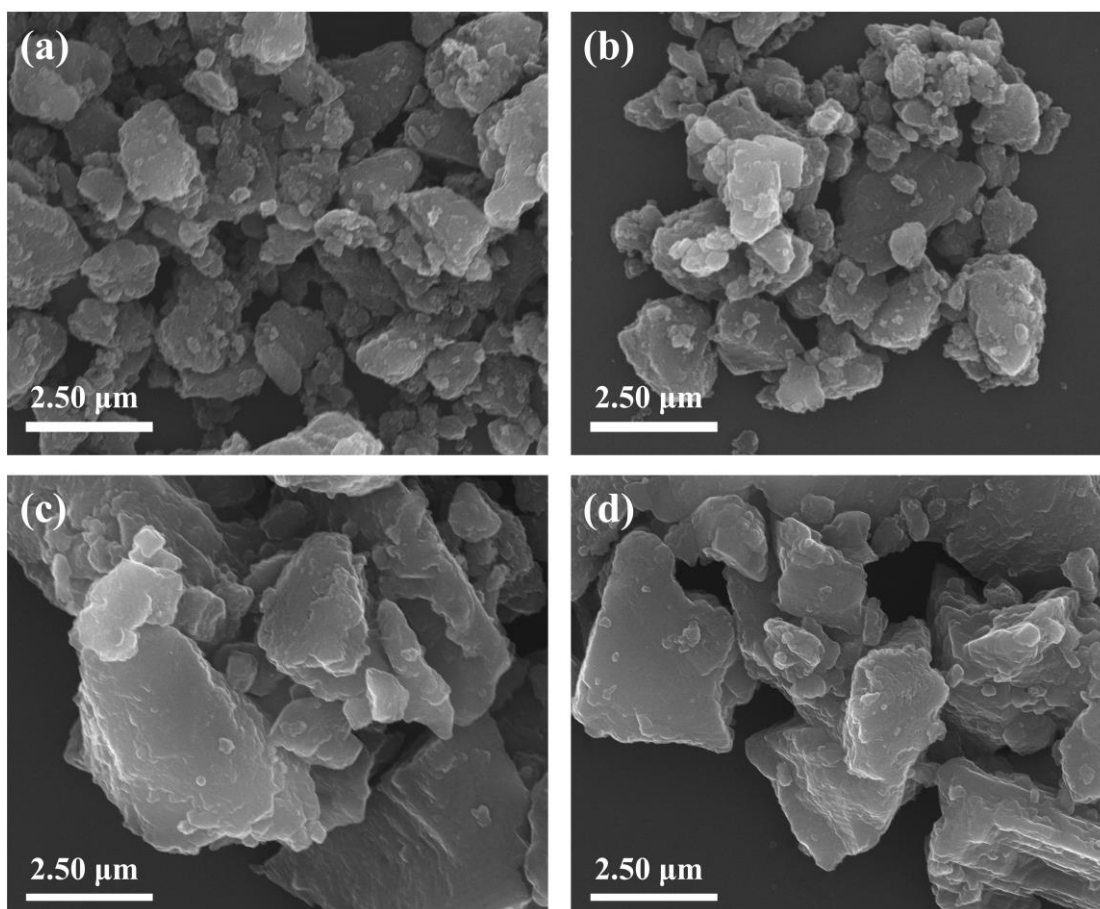

**Figure S2.** SEM image of synthesised (a-b) Mn/C<sub>60</sub> and (c-d) C<sub>60</sub>.

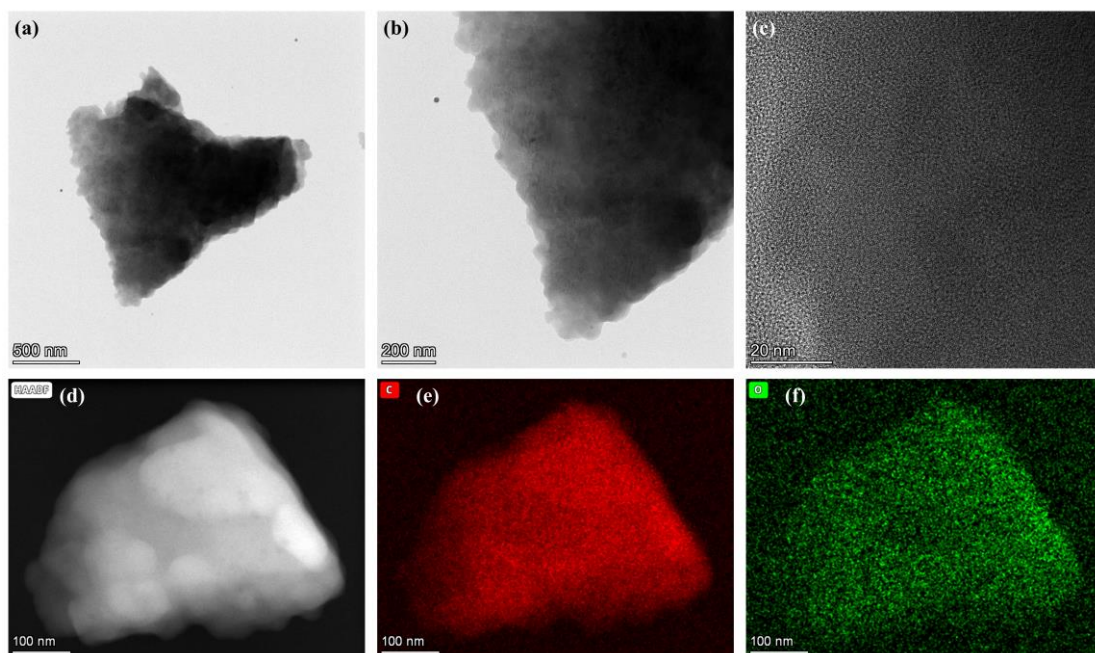

**Figure S3.** (a-c) The high resolution transmission electron microscopy (HRTEM) image of synthesised C<sub>60</sub> and (d-f) corresponding EDS mapping images of C<sub>60</sub>.

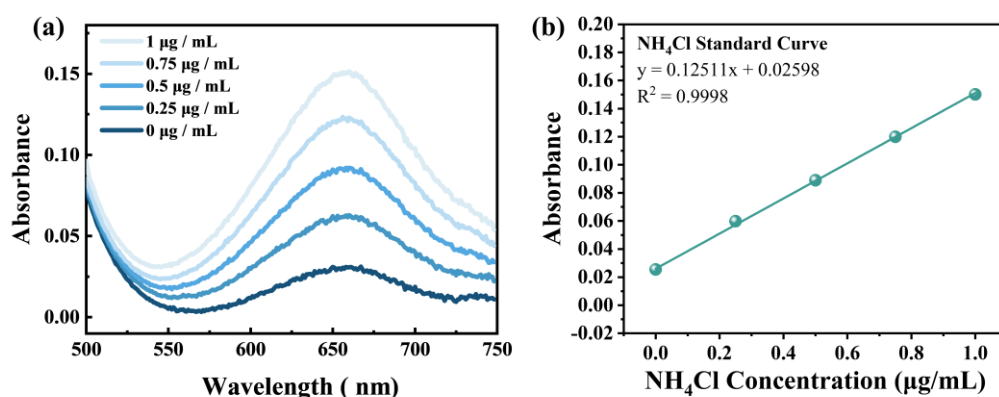

**Figure S4.** (a) UV-vis curves and (b) concentration-absorbance of NH<sub>4</sub>Cl solution with a series of standard concentration (0-1 µg mL<sup>-1</sup>) in 0.08 M Na<sub>2</sub>HPO<sub>4</sub>. The absorbance at 655 nm was measured by UV-vis spectrophotometer. The standard curve showed good linear relation of absorbance with NH<sub>4</sub>Cl concentration ( $y=0.12511x+0.02598$ ,  $R^2=0.9998$ ).

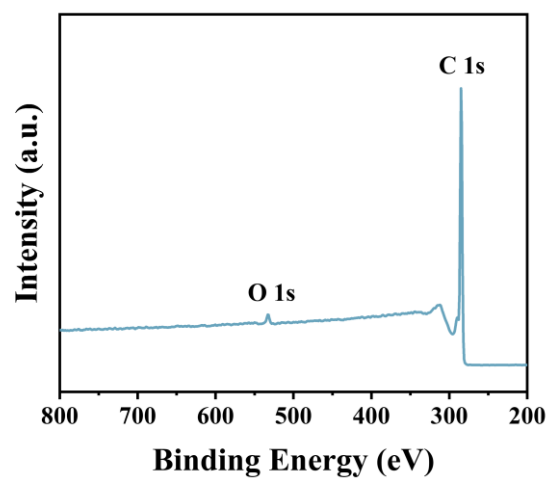

**Figure S5.** XPS survey spectrum of C<sub>60</sub>.

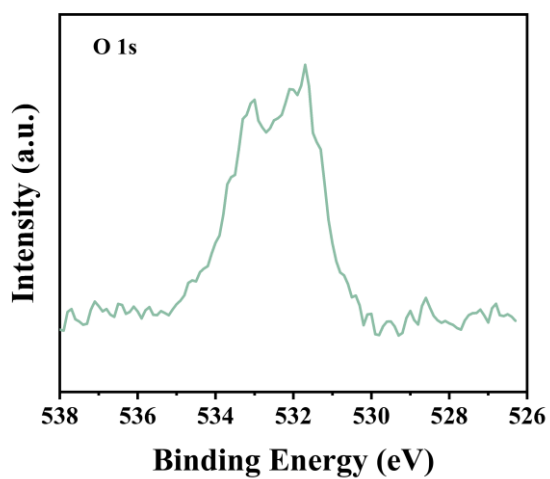

**Figure S6.** High-resolution XPS spectra of O 1s for C<sub>60</sub>.

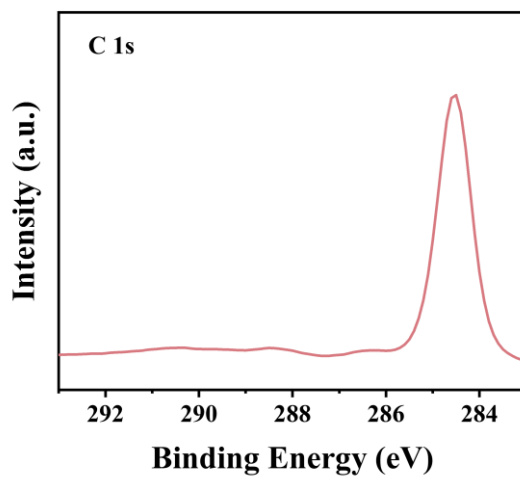

**Figure S7.** High-resolution XPS spectra of C 1s for C<sub>60</sub>.

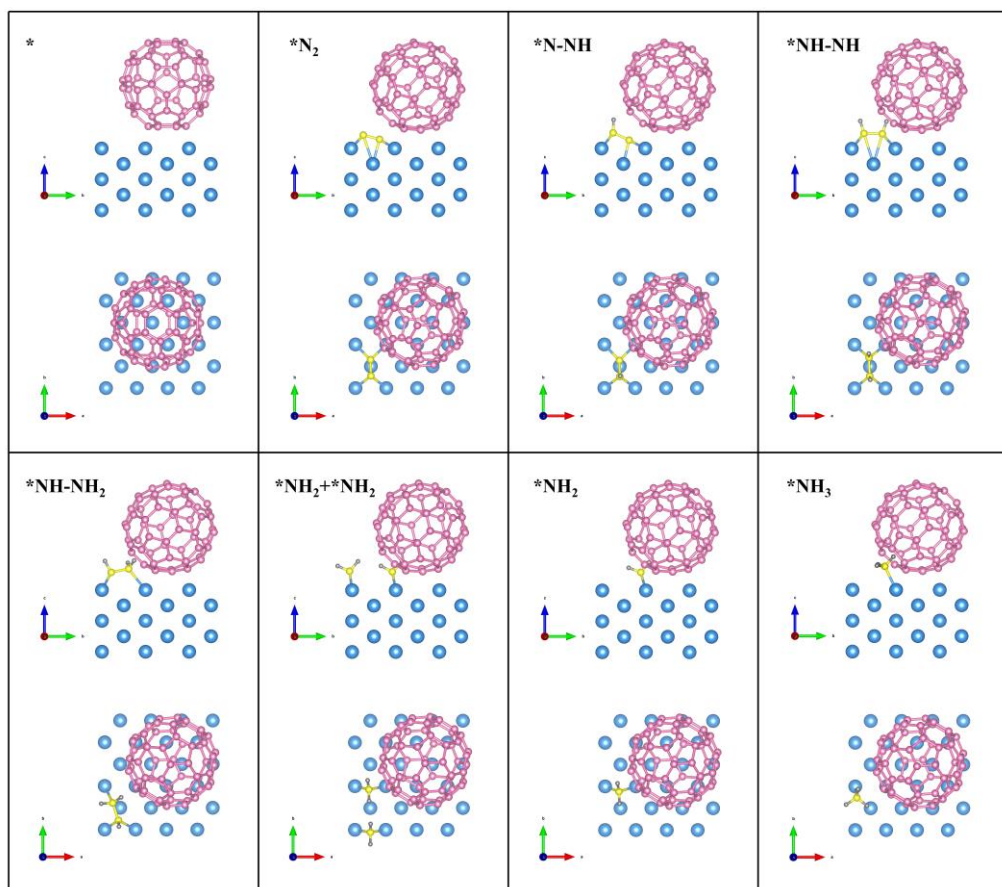

**Figure S8.** Adsorption configurations of different species during the NRR on Mn/C<sub>60</sub>.

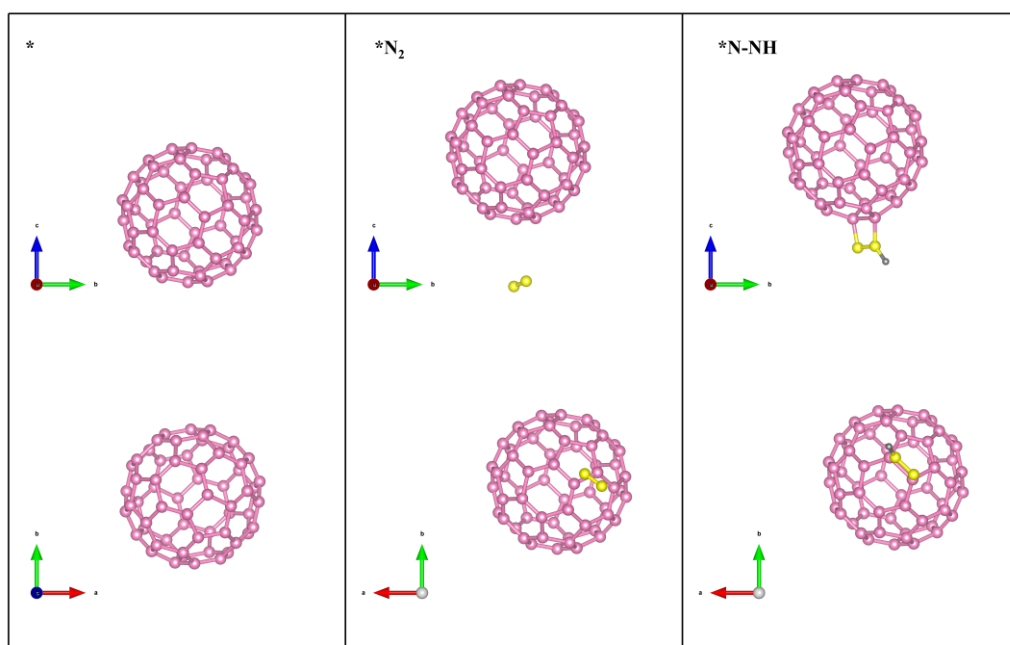

**Figure S9.** Adsorption configurations of different species during  $N_2 \rightarrow *N_2H$  on C<sub>60</sub>.

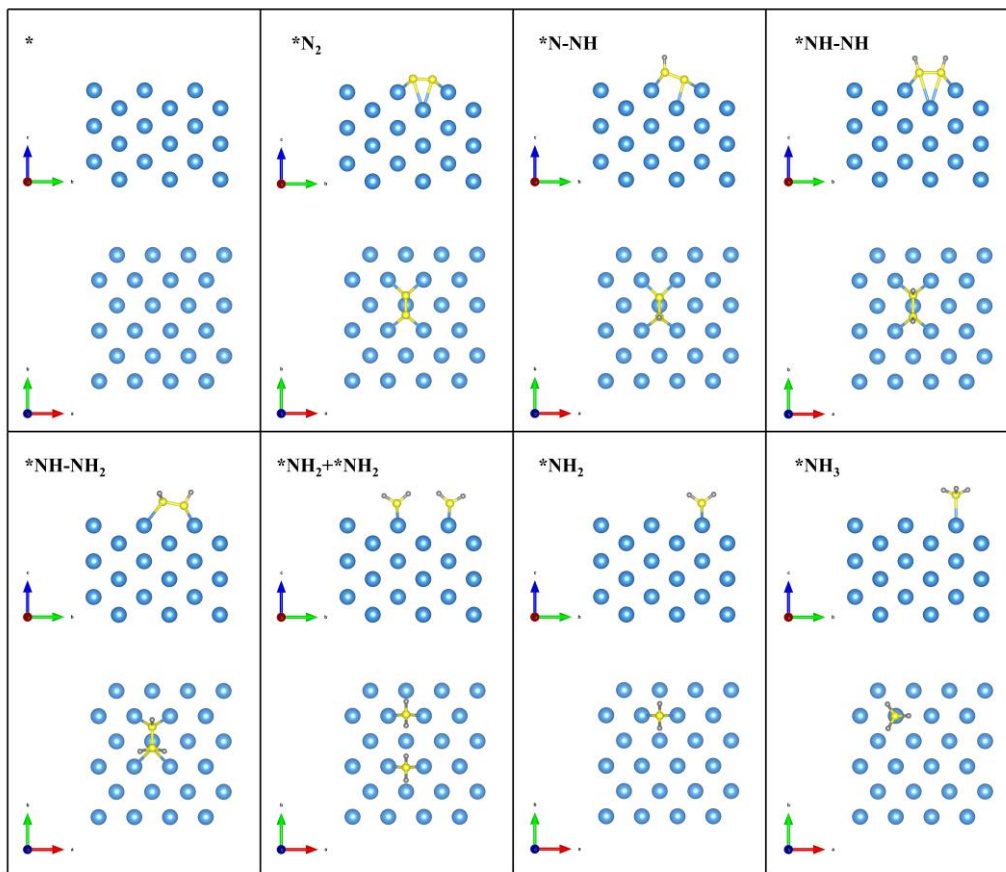

**Figure S10.** Adsorption configurations of different species during the NRR on Mn.

**Table S2.** Calculated zero-point energy ( $E_{\text{ZPE}}$ ) and  $TS$  of different adsorption species, where \* denotes the adsorption site, and 298.15 K.

| Adsorption species                 | $E_{\text{ZPE}}$ (eV) | $TS$ (eV) |
|------------------------------------|-----------------------|-----------|
| *N $\equiv$ *N                     | 0.19                  | 0.14      |
| *N $\equiv$ N                      | 0.21                  | 0.13      |
| *N-*NH                             | 0.47                  | 0.19      |
| *NH-*NH                            | 0.82                  | 0.19      |
| *NH <sub>2</sub> -*N               | 0.83                  | 0.12      |
| *NH-*NH <sub>2</sub>               | 1.14                  | 0.18      |
| *NH <sub>2</sub> +*NH <sub>2</sub> | 1.25                  | 0.25      |
| *NH <sub>2</sub>                   | 0.63                  | 0.14      |
| *NH <sub>3</sub>                   | 1.02                  | 0.16      |
| *H                                 | 0.15                  | 0.01      |

**Table S3.** Energies of N<sub>2</sub>, H<sub>2</sub>, NH<sub>3</sub> adopted in this work where  $E_{\text{DFT}}$  stands for the energy obtained from DFT calculations. For the gas molecules, their  $E_{\text{ZPE}}$  and  $S$  values (gas phase H<sub>2</sub>, N<sub>2</sub>, NH<sub>3</sub> at T = 298.15 K, P = 1 bar) are from the NIST database. (<https://doi.org/10.18434/T4D303>)

| Species         | $E_{\text{DFT}}$ (eV) | $E_{\text{ZPE}}$ (eV) | $TS$ (eV) | $G$ (eV) |
|-----------------|-----------------------|-----------------------|-----------|----------|
| H <sub>2</sub>  | -6.77                 | 0.27                  | 0.40      | -6.90    |
| N <sub>2</sub>  | -16.63                | 0.15                  | 0.60      | -17.08   |
| NH <sub>3</sub> | -19.54                | 0.91                  | 0.60      | -19.23   |

**Table S4.** Comparison of the electrocatalytic activity of Mn/C<sub>60</sub> to produce NH<sub>3</sub> through NRR with previously reported NRR electrocatalysts.

| Catalyst                                         | NH <sub>3</sub> yield rate ( $\mu\text{g h}^{-1} \text{mg}^{-1}$ ) | Faradaic efficiency (%) | Reference |
|--------------------------------------------------|--------------------------------------------------------------------|-------------------------|-----------|
| Mn/C <sub>60</sub>                               | 14.52                                                              | 42.18                   | This work |
| Pd/C                                             | 4.5                                                                | 8.2                     | 8         |
| V <sub>2</sub> O <sub>3</sub> /C                 | 12.3                                                               | 7.28                    | 9         |
| C-TiO <sub>2</sub>                               | 16.22                                                              | 1.84                    | 10        |
| Mn <sub>3</sub> O <sub>4</sub><br>Nanocube       | 11.6                                                               | 3                       | 11        |
| F-SnO <sub>2</sub> /CC                           | 19.3                                                               | 8.6                     | 12        |
| SnO <sub>2</sub> /CC                             | 4.03                                                               | 2.17                    | 13        |
| NPC                                              | 27.2                                                               | 1.42                    | 14        |
| Nb <sub>2</sub> O <sub>5</sub><br>nanofiber      | 43.6                                                               | 9.26                    | 15        |
| Au-Bi <sub>2</sub> Te <sub>3</sub><br>Nanosheets | 32.73                                                              | 20.39                   | 16        |
| WO <sub>x</sub> /NPC                             | 46.8                                                               | 10.2                    | 17        |
| PC/Sb/SbPO <sub>4</sub>                          | 23                                                                 | 34                      | 18        |

## References

1. G. Kresse and J. Furthmüller, *Phys. Rev. B: Condens. Matter Mater. Phys.*, 1996, **54**, 11169-11186.
2. G. Kresse and J. Furthmüller, *Comput. Mater. Sci.*, 1996, **6**, 15-50.
3. J. P. Perdew, J. A. Chevary, S. H. Vosko, K. A. Jackson, M. R. Pederson, D. J. Singh and C. Fiolhais, *Phys. Rev. B.*, 1992, **46**, 6671.
4. J. P. Perdew and Y. Wang, *Phys. Rev. B, Condens. Matter.*, 1992, **45**, 13244-13249.
5. G. Kresse and D. Joubert, *Phys. Rev. B.*, 1999, **59**, 1758-1775.
6. S. Grimme, J. Antony, S. Ehrlich and H. Krieg, *J. Chem. Phys.*, 2010, **132**, 154104.
7. J. K. Norskov, J. Rossmeisl, A. Logadottir, L. Lindqvist, J. R. Kitchin, T. Bligaard and H. Jonsson, *J. Phys. Chem. B*, 2004, **108**, 17886-17892.
8. J. Wang, L. Yu, L. Hu, G. Chen, H. Xin and X. Feng, *Nat. Commun.*, 2018, **9**, 1795.
9. R. Zhang, J. Han, B. Zheng, X. Shi, A. M. Asiri and X. Sun, *Inorg. Chem. Front.*, 2019, **6**, 391-395.
10. K. Jia, Y. Wang, Q. Pan, B. Zhong, Y. Luo, G. Cui, X. Guo and X. Sun, *Nanoscale Adv.*, 2019, **1**, 961-964.
11. X. Wu, L. Xia, Y. Wang, W. Lu, Q. Liu, X. Shi and X. Sun, *Small*, 2018, **14**, 1803111.
12. K. Chu, Y.-p. Liu, Y.-b. Li, H. Zhang and Y. Tian, *J. Mater. Chem. A*, 2019, **7**, 4389-4394.
13. L. Zhang, X. Ren, Y. Luo, X. Shi, A. M. Asiri, T. Li and X. Sun, *Chem. Commun.*, 2018, **54**, 12966-12969.
14. Y. Liu, Y. Su, X. Quan, X. Fan, S. Chen, H. Yu, H. Zhao, Y. Zhang and J. Zhao, *ACS Catal.*, 2018, **8**, 1186-1191.
15. J. Han, Z. Liu, Y. Ma, G. Cui, F. Xie, F. Wang, Y. Wu, S. Gao, Y. Xu and X. Sun, *Nano Energy*, 2018, **52**, 264-270.

16. M. Liu, S. Yin, T. Ren, Y. Xu, Z. Wang, X. Li, L. Wang and H. Wang, *ACS Appl. Mater. Interfaces*, 2021, **13**, 47458-47464.
17. Z. Lu, H. Wang, Y. Tao, S. Zhu, W. Hao, X. Liu, Y. Min and J. Fan, *Nanoscale*, 2023, **15**, 14847-14857.
18. X. Liu, H. Jang, P. Li, J. Wang, Q. Qin, M. G. Kim, G. Li and J. Cho, *Angew. Chem., Int. Ed.*, 2019, **58**, 13329-13334.
